# Supplementary material
Source: PubMed Central journal article supplement (PMC6169790)
Supplement: NIHMS1504421-supplement-1.pdf [file NIHMS1504421-supplement-1.pdf]

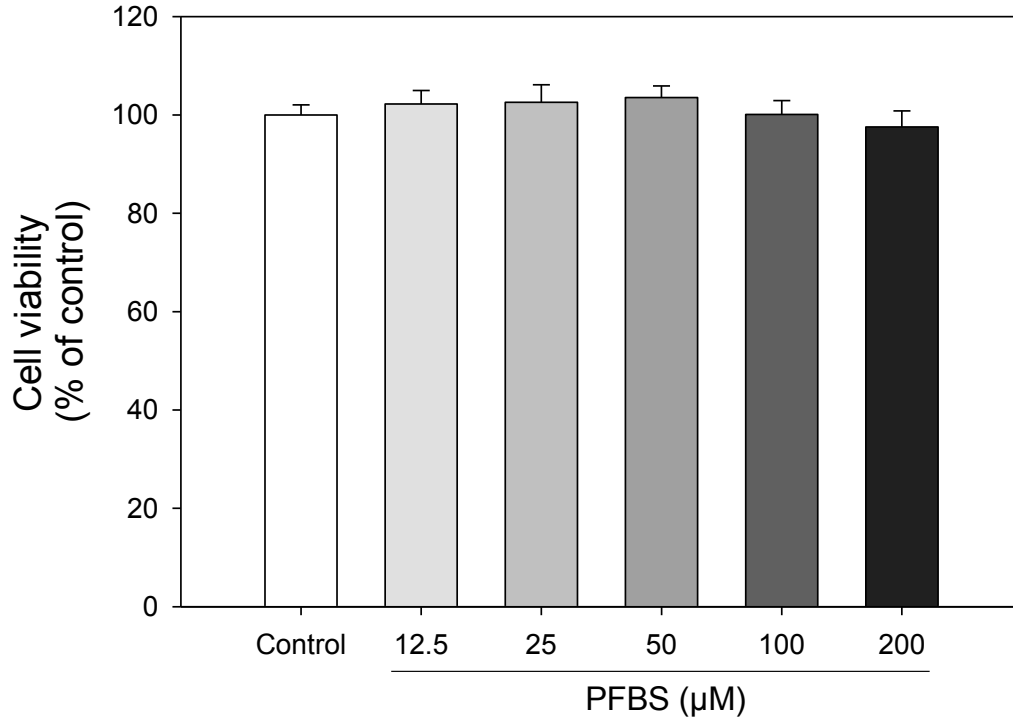

**Supplementary Figure S1.** Cytotoxicity of PFBS in 3T3-L1 myotubes. 3T3-L1 cells in 96-well culture plates were treated with PFBS (12.5, 25, 50, 100 and 200 µM) for 6 days during differentiation. On day 6, the medium was removed and switched to 5mg/mL MTT in DMEM (without phenol red) for 4 h at 37°C. Then by adding 100 µL DMSO, the formation of formazan crystals from live cells was dissolved and measured with a microplate reader at 570 nm. Numbers are mean  $\pm$  S.E. (n= 10). No significant difference was found among treatments.

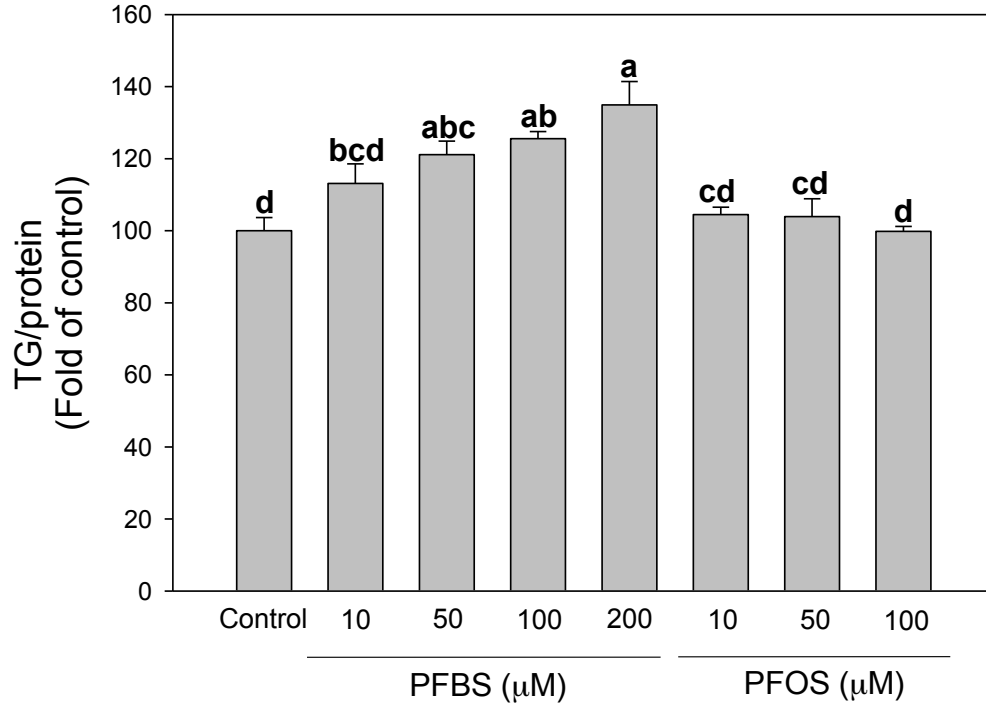

**Supplementary Figure S2.** Effects of PFBS and PFOS on the adipogenesis of 3T3-L1 cells. After treatment for 6 days, adipocytes were harvested and measured for triglyceride content that were normalized by protein. Numbers are mean  $\pm$  S.E. (n=4). Means with different letters are significantly different at  $P < 0.05$ .
